# Supplementary material for: Porous nickel sulfide nanorods serve as a multifunctional electrocatalyst for the hydrogen evolution reaction, urea electrooxidation reaction, and nitrate reduction reaction
Source: Royal Society of Chemistry journal article supplement (doi:10.1039/d4ta03840a), 2024-01-01
Supplement: d4ta03840a1.pdf [file d4ta03840a1.pdf]

**Porous nickel sulfide nanorods serve as multifunctional electrocatalyst for hydrogen evolution reaction, urea electro-oxidation reaction, and nitrate reduction reaction**

Xiaoyu Zhang<sup>a</sup>, Jiayi Wang<sup>a</sup>, Kai Zong<sup>a</sup>, Lin Yang<sup>a</sup>, Xin Wang<sup>\*a</sup>, Zhongwei Chen<sup>\*b</sup>

<sup>a</sup>Institute of Carbon Neutrality, Zhejiang Wanli University, Ningbo 315100, China

E-mail: wangx@zwu.edu.cn (X. Wang).

<sup>b</sup>Dalian Institute of Chemical Physics, Chinese Academy of Sciences, Dalian 116023, China

E-mail: zwchen@dicp.ac.cn (Z. Chen)

## Electrochemical Measurements

Linear sweep voltammetry (LSV), chronopotentiometry (CP), and electrochemical impedance (EIS) measurements were carried out in a 1.0 M KOH for the OER and HER, 1.0 M KOH+ 0.33 M urea for the UEOR, and 0.5 M Na<sub>2</sub>SO<sub>4</sub>+ 0.1 M NaNO<sub>3</sub> for NO<sub>3</sub>RR using CHI 760E workstation. To prepare the catalyst ink, 2.0 mg of the catalyst, 0.2 mL of H<sub>2</sub>O, 0.8 mL of C<sub>2</sub>H<sub>5</sub>OH and 5  $\mu$ L of Nafion (5 wt%) solution were mixed and ultrasonicated for 30 min. All measurements were performed in a three-electrode configuration at room temperature, using a saturated calomel electrode as the reference electrode and a platinum plate as the counter electrode. All potentials in this work were calibrated to the reversible hydrogen electrode (RHE).

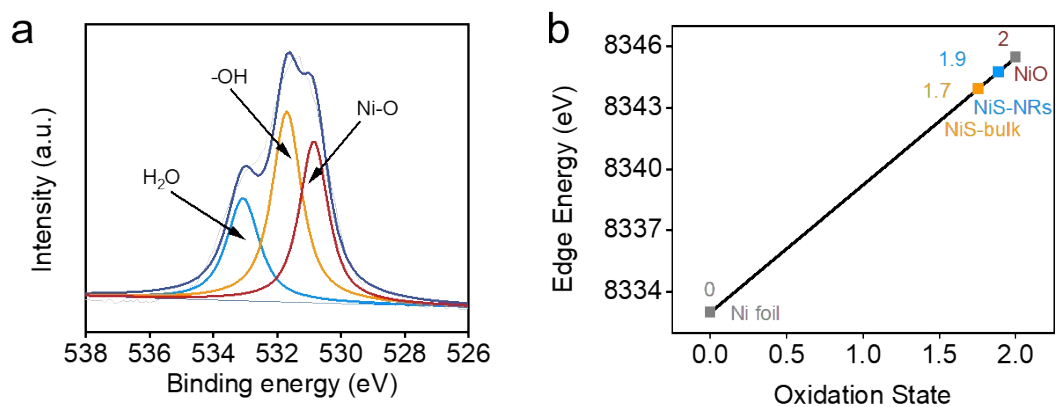

**Figure S1** (a) The XPS spectra of O 2p of NiS-NRs. (b) Fitted oxidation states of Ni for NiS-NRs, NiS-bulk, NiO, and Ni foil.

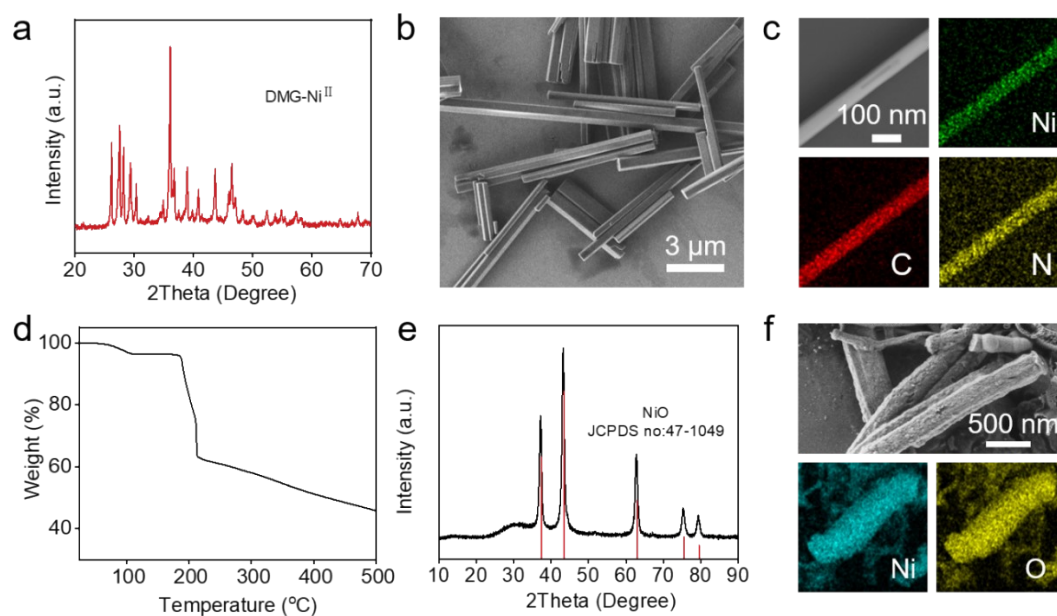

**Figure S2** (a) The XRD pattern, (b) SEM image, (c) EDS maps, and (d) TG curve of the DMG-Ni<sup>II</sup> complex nanorods. (e) The XRD pattern and (f) SEM image of NiO nanorods.

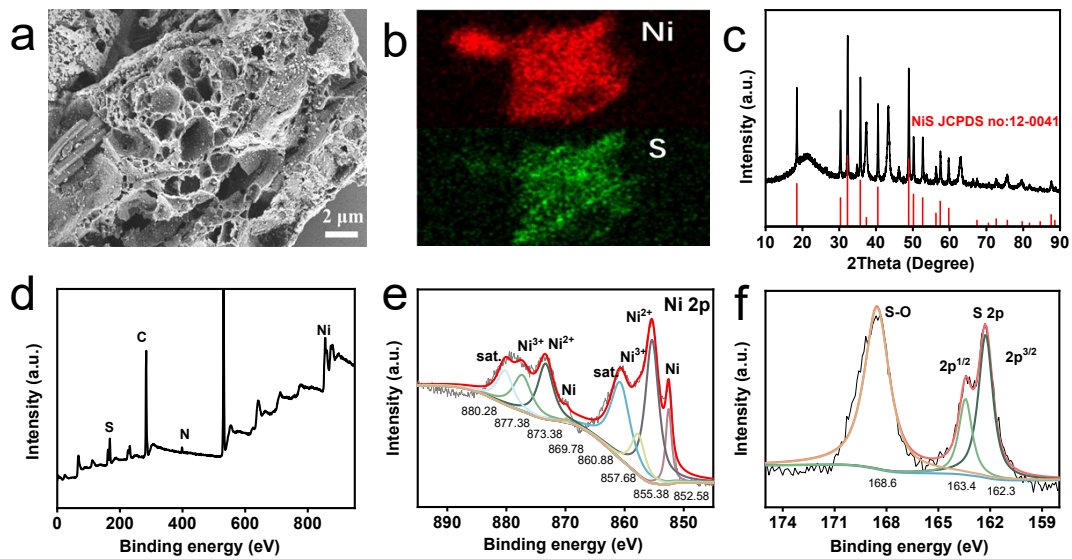

**Figure S3** (a) The SEM image, (b) EDX maps, (c) XRD pattern, (d) XPS survey spectrum, (e) Ni 2p XPS spectrum, and (f) S 2p XPS spectrum of NiS-bulk.

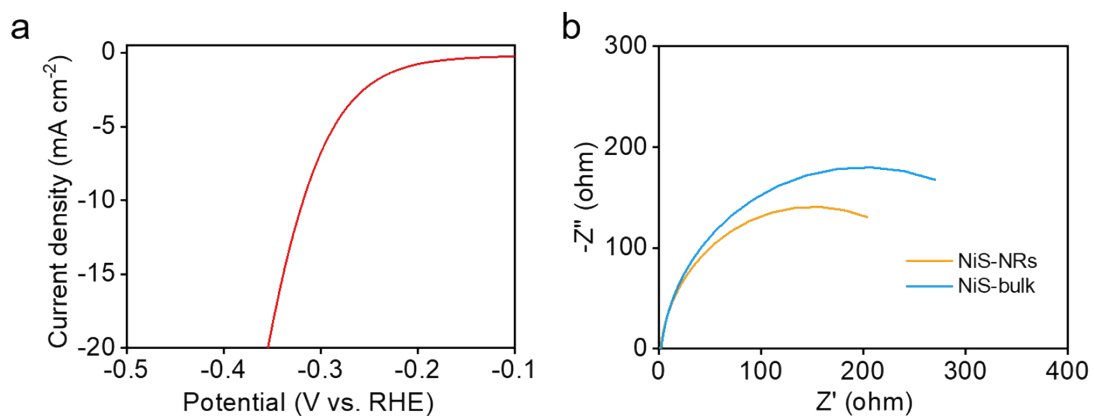

**Figure S4** (a) HER performance of NiO. (b) Nyquist plots of the NiS-NRs and NiS-bulk in  $N_2$ -saturated 1.0 M KOH electrolyte.

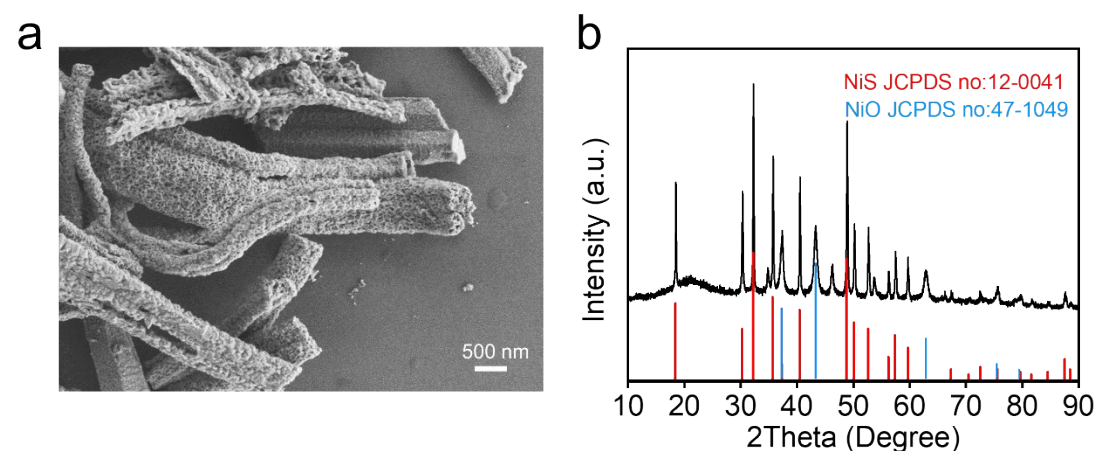

**Figure S5** (a) the SEM image and (b) XRD pattern of NiS-NRs after HER stability test.

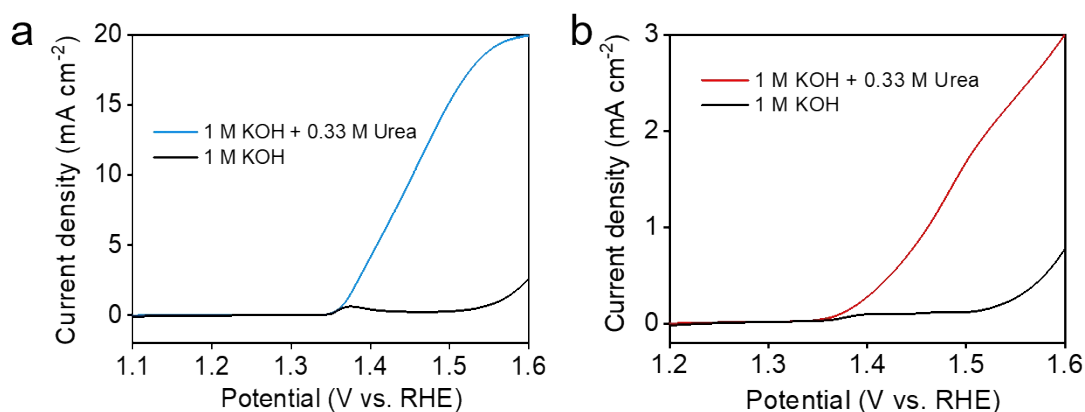

**Figure S6** (a) LSV curves of NiS-bulk in N<sub>2</sub>-saturated 1.0 M KOH solution with and without 0.33 M urea at 10 mV s<sup>-1</sup>. (b) LSV curves of NiO in N<sub>2</sub>-saturated 1.0 M KOH solution with and without 0.33 M urea at 10 mV s<sup>-1</sup>.

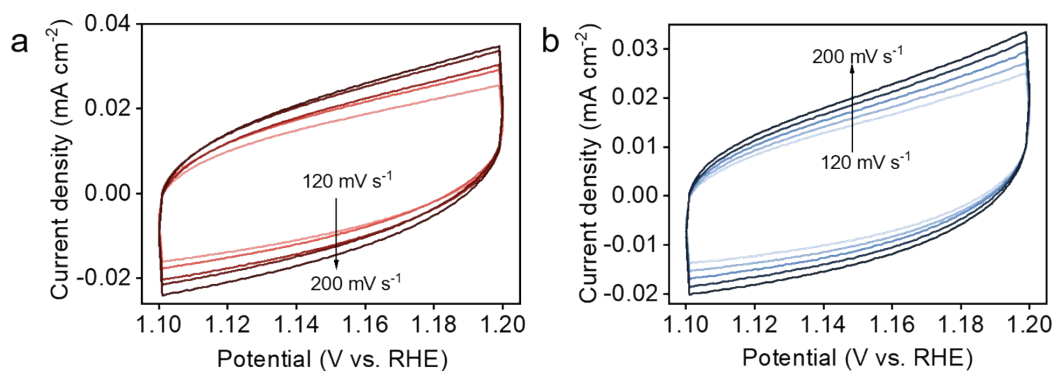

**Figure S7** CV curves of (a) NiS-NRs and (b) NiS-Bulk in N<sub>2</sub>-saturated 1.0 M KOH solution at different scan rates.

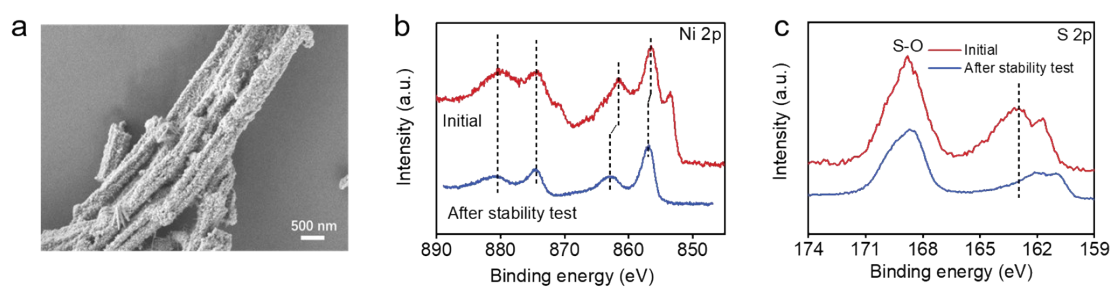

**Figure S8** (a) The SEM image of the NiS-NRs catalyst after the stability test. XPS spectra of (b) Ni 2p and (c) S 2p of NiS-NRs catalyst before and after stability test.

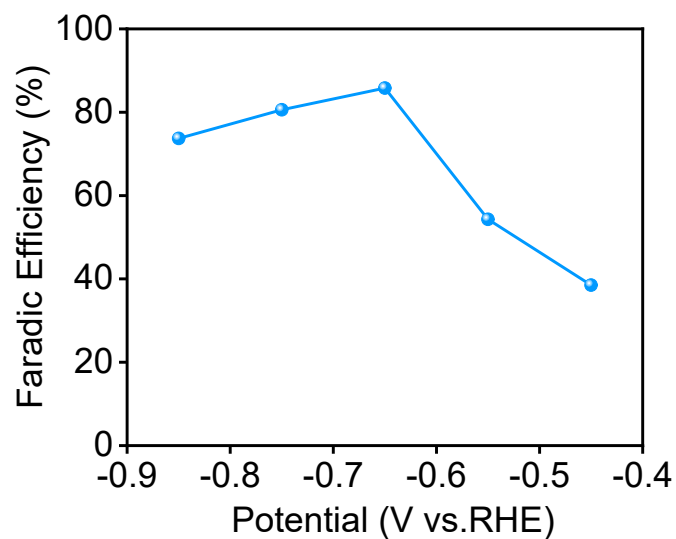

Figure S9 Potential-dependent Faradaic efficiency of NH<sub>3</sub> on NiS-NRs.

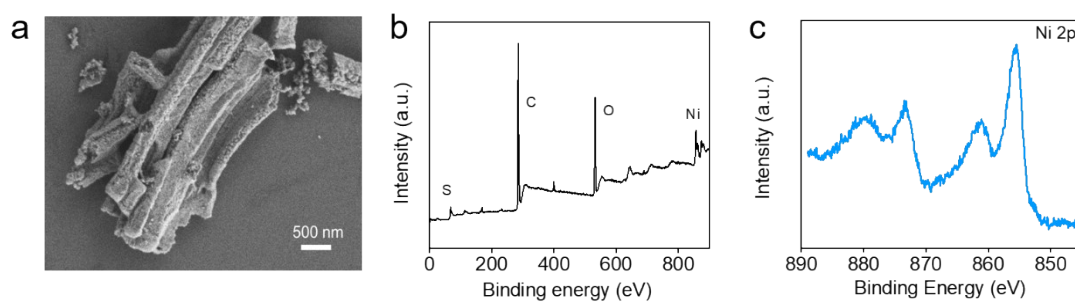

Figure S10 (a) The SEM image of the NiS-NRs catalyst after NO<sub>3</sub>RR test. (b) XPS full-scan survey spectrum of NiS-NRs after NO<sub>3</sub>RR test. (c) XPS spectra of Ni 2p of NiS-NRs catalyst after NO<sub>3</sub>RR test.

**Table S1** Comparison of the electrochemical performance of Ni-based electrocatalysts in UEOR.

| Electrocatalysts                                     | Electrolyte             | UEOR<br>$j_{10}$ (V) | Urea electrolyzer<br>$j_{10}$ (V) | Ref.      |
|------------------------------------------------------|-------------------------|----------------------|-----------------------------------|-----------|
| NiS nanorods                                         | 1.0 M KOH + 0.33 M Urea | 1.37                 | 1.41                              | This work |
| NiSe <sub>2</sub> /MoSe <sub>2</sub>                 | 1.0 M KOH + 0.33 M Urea | 1.34                 | 1.44                              | 1         |
| NiSe                                                 | 1.0 M KOH + 0.33 M Urea | 1.40                 | 1.47                              | 2         |
| NiS nanotube                                         | 1.0 M KOH + 0.33 M Urea | 1.36                 | 1.445                             | 3         |
| NiS@Ni-CNFs                                          | 1.0 M KOH + 0.33 M Urea | 1.366                | 1.44                              | 4         |
| Fe-doped NiS-NiS <sub>2</sub>                        | 1.0 M KOH + 0.33 M Urea | 1.34                 | 1.55                              | 5         |
| O <sub>vac</sub> -V-Ni(OH) <sub>2</sub>              | 1.0 M KOH + 0.33 M Urea | 1.38                 | 1.50                              | 6         |
| Ir-NiFe-OH                                           | 1.0 M KOH + 0.33 M Urea | 1.36                 | 1.42                              | 7         |
| Fe-NiSe <sub>2</sub>                                 | 1.0 M KOH + 0.33 M Urea | 1.38                 | 1.45                              | 2         |
| Ni <sub>3</sub> S <sub>2</sub> -Ni <sub>3</sub> P/NF | 1.0 M KOH + 0.33 M Urea | 1.37                 | 1.43                              | 8         |

**Table S2** Comparison of the electrochemical performance of Ni-based electrocatalysts in NO<sub>3</sub>RR

| Electrocatalysts                      | Electrolyte                                                                                | Onset potential (V) | NH <sub>4</sub> yield (mmol h <sup>-1</sup> mg <sub>cat</sub> <sup>-1</sup> ) | Ref.      |
|---------------------------------------|--------------------------------------------------------------------------------------------|---------------------|-------------------------------------------------------------------------------|-----------|
| NiS nanorods                          | 0.5 M SO <sub>4</sub> <sup>2-</sup> +0.1 M NO <sub>3</sub> <sup>-</sup>                    | -0.42               | 0.513                                                                         | This work |
| Ni <sub>2</sub> P                     | 0.5 M SO <sub>4</sub> <sup>2-</sup> +0.05 M NO <sub>3</sub> <sup>-</sup>                   | -0.6                | 0.056                                                                         | 9         |
| CuNi                                  | 0.1 M PBS + 0.5 mg mL <sup>-1</sup> NO <sub>3</sub> <sup>-</sup>                           | -0.8                | 0.3659                                                                        | 10        |
| CuNi solid solution alloys            | 1 M KOH +0.1 M NO <sub>3</sub> <sup>-</sup>                                                | 0.1                 | 0.264                                                                         | 11        |
| Cu/Ni- N-doped carbon                 | 0.5 M SO <sub>4</sub> <sup>2-</sup> + 0.1 mg mL <sup>-1</sup> NO <sub>3</sub> <sup>-</sup> | -0.46               | 0.324 mmol h <sup>-1</sup> cm <sup>-2</sup>                                   | 12        |
| BCN@Ni                                | 0.1 M KOH + 0.1 M NO <sub>3</sub> <sup>-</sup>                                             | 0                   | 0.1365 mmol h <sup>-1</sup> cm <sup>-2</sup>                                  | 13        |
| Cu <sub>0.25</sub> Ni <sub>0.25</sub> | 1 M KOH + 0.075 M NO <sub>3</sub> <sup>-</sup>                                             | 0.18                | 0.5496 mmol h <sup>-1</sup> cm <sup>-2</sup>                                  | 14        |



## Reference

1. X. Xu, H. Liao, L. Huang, et al., Surface reconstruction and directed electron transport in NiSe<sub>2</sub>/MoSe<sub>2</sub> Mott-Schottky heterojunction catalysts promote urea-assisted water splitting, *Appl. Catal., B: Environ.*, 2024, **341**, 123312.
2. L. Yu, X. Pang, Z. Tian, et al., Fe-doped NiSe<sub>2</sub> nanorods for enhanced urea electrolysis of hydrogen generation, *Electrochimica Acta*, 2023, **440**, 141724.
3. M. Zhong, W. Li, C. Wang, et al., Synthesis of hierarchical nickel sulfide nanotubes for highly efficient electrocatalytic urea oxidation, *Applied Surface Science*, 2022, **575**, 151708.
4. M. Zhong, J. Yang, M. Xu, et al., Significantly Enhanced Energy-Saving H<sub>2</sub> Production Coupled with Urea Oxidation by Low- and Non-Pt Anchored on NiS-Based Conductive Nanofibers, *Small*, 2024, **20**, e2304782.
5. S. Huang, Q. Zhang, P. Xin, et al., Construction of Fe-doped NiS-NiS<sub>2</sub> Heterostructured Microspheres Via Etching Prussian Blue Analogues for Efficient Water-Urea Splitting, *Small*, 2022, **18**, e2106841.
6. H. Qin, Y. Ye, J. Li, et al., Synergistic Engineering of Doping and Vacancy in Ni(OH)<sub>2</sub> to Boost Urea Electrooxidation, *Adv Funct Mater*, 2022, **33**, 2209698.
7. X. Chen, J. Wan, J. Chai, et al., Nickel-iron in the second coordination shell boost single-atomic-site iridium catalysts for high-performance urea electrooxidation, *Nano Research*, 2024, **17**, 3919-3926.
8. J. Liu, Y. Wang, Y. Liao, et al., Heterostructured Ni<sub>3</sub>S<sub>2</sub>-Ni<sub>3</sub>P/NF as a Bifunctional Catalyst for Overall Urea-Water Electrolysis for Hydrogen Generation, *ACS Applied Materials & Interfaces*, 2021, **13**, 26948-26959.
9. Q. Yao, J. Chen, S. Xiao, et al., Selective Electrocatalytic Reduction of Nitrate to Ammonia with Nickel Phosphide, *ACS Appl Mater Interfaces*, 2021, **13**, 30458-30467.
10. J. Zhao, L. Liu, Y. Yang, et al., Insights into Electrocatalytic Nitrate Reduction to Ammonia via Cu-Based Bimetallic Catalysts, *ACS Sustainable Chem Eng*, 2023, **11**, 2468-2475.
11. Y.-Y. Lou, Q.-Z. Zheng, S.-Y. Zhou, et al., Phase-dependent Electrocatalytic Nitrate Reduction to Ammonia on Janus Cu@Ni Tandem Catalyst, *ACS Catal*, 2024, **14**, 5098-5108.
12. Y. Wang, H. Yin, F. Dong, et al., N-Coordinated Cu-Ni Dual-Single-Atom Catalyst for Highly Selective Electrocatalytic Reduction of Nitrate to Ammonia, *Small*, 2023, **19**, e2207695.
13. X. Zhao, Z. Zhu, Y. He, et al., Simultaneous anchoring of Ni nanoparticles and single-atom Ni on BCN matrix promotes efficient conversion of nitrate in water into high-value-added ammonia, *Chem Eng J*, 2022, **433**, 133190.
14. J. Wang, L. Zhang, Y. Wang, et al., Facet and d-band center engineering of CuNi nanocrystals for efficient nitrate electroreduction to ammonia, *Dalton Trans*, 2022, **51**, 15111-15120.
